# Supplementary material for: Dynamic interactions and Ca2+-binding modulate the holdase-type chaperone activity of S100B preventing tau aggregation and seeding
Source: PubMed Central journal article supplement (PMC8560819; doi:10.1038/s41467-021-26584-2), 2021-11-01
Supplement: 41467_2021_26584_MOESM2_ESM.pdf [file 41467_2021_26584_MOESM2_ESM.pdf]

## Description of Additional Supplementary Files

### **Supplementary Movie 1 - Mapping interactions of hTau441, K18 and R2 peptide on the S100B structure.**

**Description:** Structural mapping on the S100B structure (PDB: 2H61) of the chemical shift perturbations observed upon interactions with hTau441, K18 and peptide R2. S100B residues and surface are colour code are color-coded by the variation of the combined  $^1\text{H}$ ,  $^{15}\text{N}$  chemical shift values, from red ( $\Delta\delta$  (ppm) = 0.5) to white (minimum,  $\Delta\delta$  (ppm) = 0.05). Represented using Pymol.
